# Supplementary material for: Binary cooperative NiCo2O4 on the nickel foams with quasi-two-dimensional precursors: a bridge between ‘supercapacitor’ and ‘battery’ in electrochemical energy storage
Source: Royal Society of Chemistry journal article supplement (doi:10.1039/c4cp05228e), 2015-01-01
Supplement: c4cp05228e1.pdf [file c4cp05228e1.pdf]

## Supporting Information

### **Binary Cooperative NiCo<sub>2</sub>O<sub>4</sub> on the Nickel Foams with Quasi-two-dimensional precursors: A Bridge between 'Supercapacitor' and 'Battery' in Electrochemical Energy Storage**

Tao Peng,<sup>a</sup> Zhongyu Qian,<sup>a</sup> Jun Wang,<sup>\*,a</sup> Liangti Qu<sup>b</sup> and Peng Wang<sup>c</sup>

<sup>a</sup>Key Laboratory of Superlight Material and Surface Technology, Ministry of Education, Harbin Engineering University, 150001, PR China.

<sup>b</sup> Key Laboratory of Cluster Science, Ministry of Education , School of chemistry, Beijing Institute of Technology, 100081, PR China.

<sup>c</sup> State Key Laboratory of Polymer Physics and Chemistry, Changchun Institute of Applied Chemistry, Chinese Academy of Sciences, 130022, PR China.

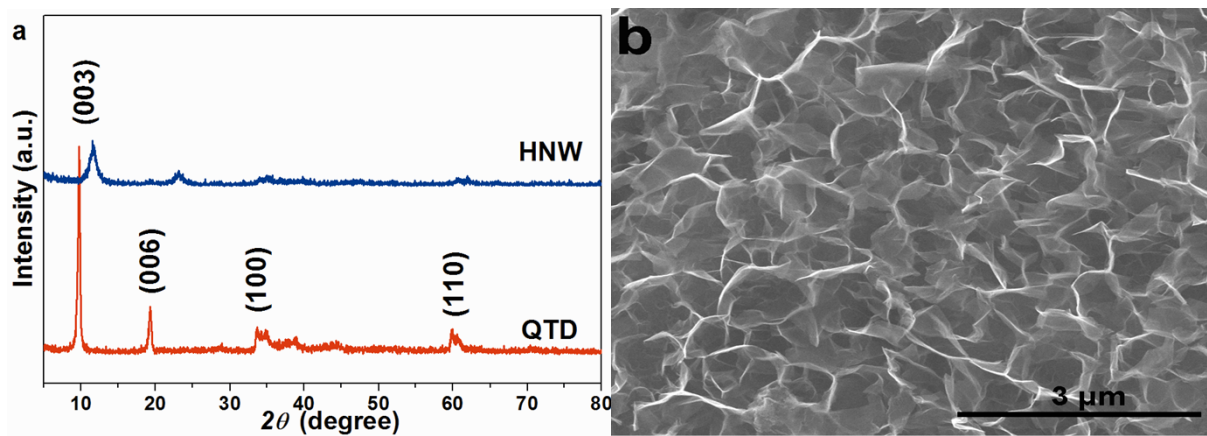

**Fig. S1.** (a) XRD of the cobalt-nickel-hydroxide precursors. (b)SEM image of the nickel foams with the surface treatment.

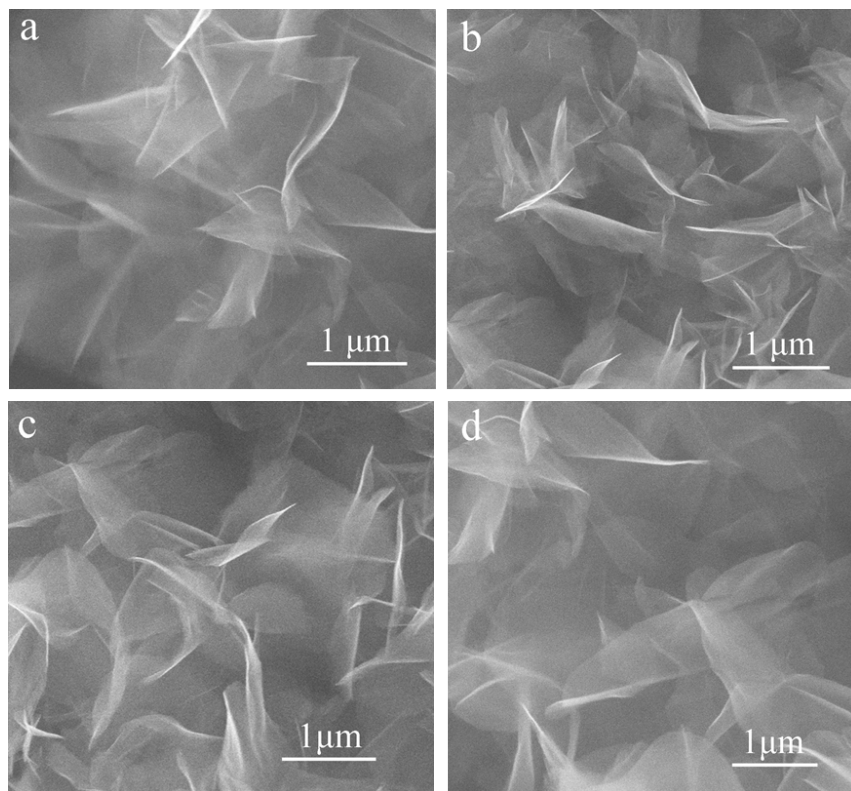

**Fig. S2** SEM images with high magnification for QTD0(a), QTD10(b), QTD20(c), QTD40(d).

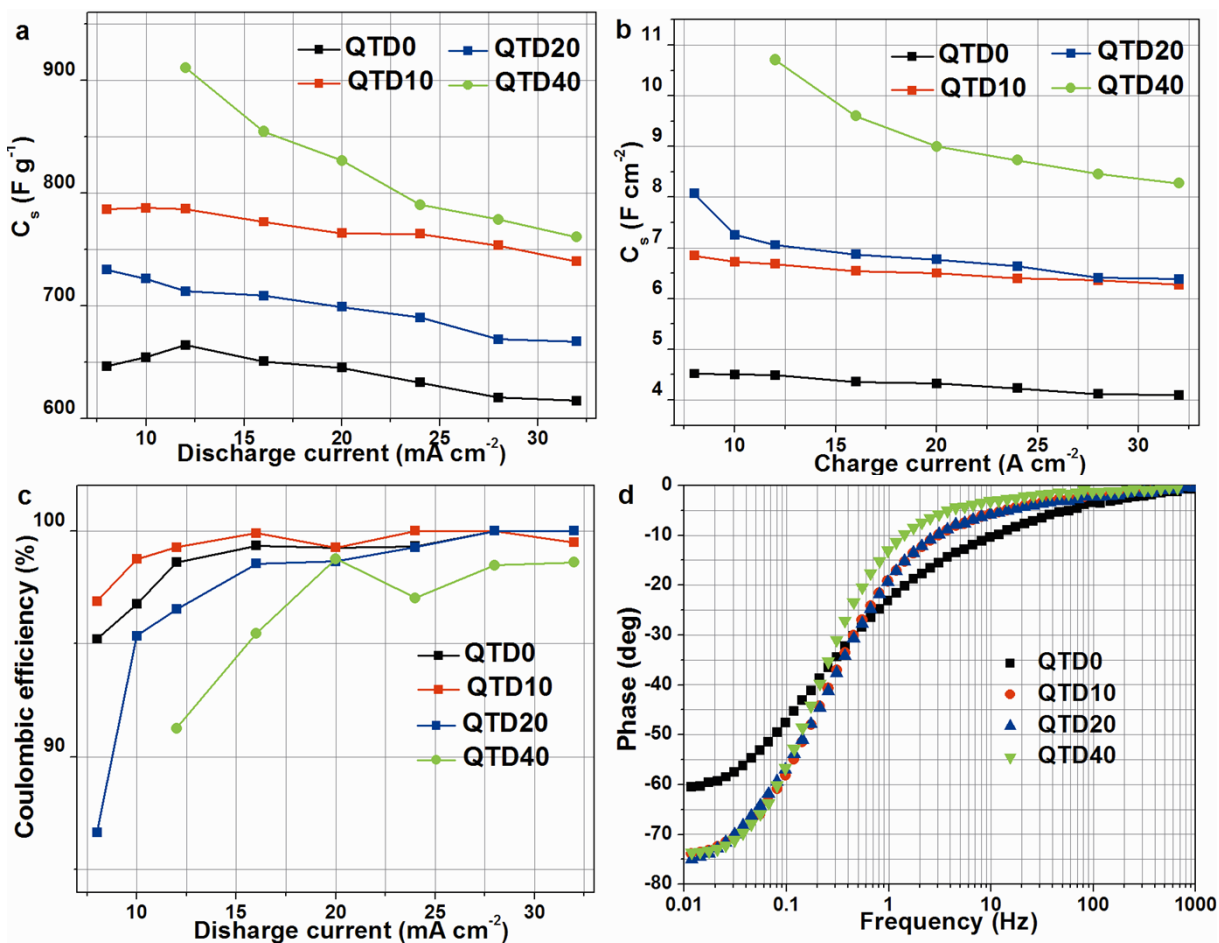

**Fig. S3.** (a) Specific capacitance ( $F g^{-1}$ ) versus current density. (b) Specific charge capacitance ( $F cm^{-2}$ ) versus current density. (c) Coulombic efficiency versus current density. (d) EIS from 10 mHz to 1000 Hz at 0 V.

**Table S1.** Result for the linear fitting of the variation of the cathodic peak potential with the scan rate.

| Slope    |         | Intercept |         |
|----------|---------|-----------|---------|
| Value    | Error   | Value     | Error   |
| -0.19273 | 0.02186 | 0.39466   | 0.02692 |
| -0.21426 | 0.01577 | 0.4202    | 0.01942 |
| -0.18352 | 0.02117 | 0.37433   | 0.02607 |
| -0.15138 | 0.00664 | 0.32783   | 0.00818 |
